# Supplementary material for: The mechanism of MICU-dependent gating of the mitochondrial Ca2+uniporter
Source: eLife journal article supplement (doi:10.7554/elife.69312), 2021-08-31
Supplement: fig1-figsupp2-data2 [file elife-69312-fig1-figsupp2-data2-v2.pdf]

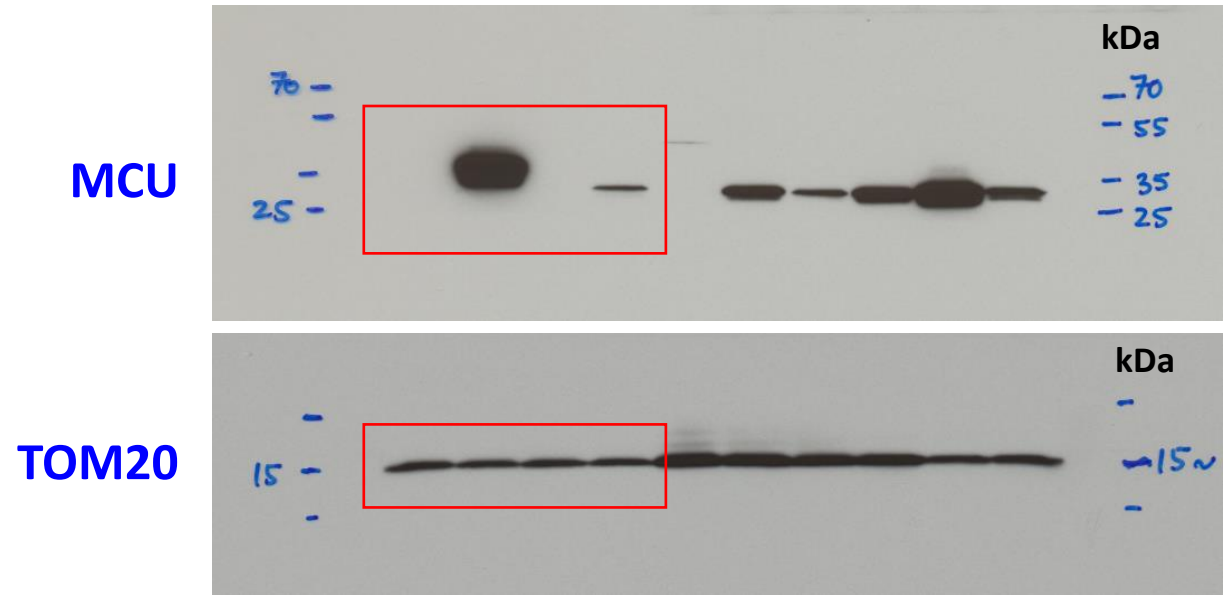

Figure 1—figure supplement 2—source data 5. Raw Western blot image for panel G.
