# Supplementary material for: The mechanism of MICU-dependent gating of the mitochondrial Ca2+uniporter
Source: eLife. 2021 Aug 31;10:e69312. doi: 10.7554/eLife.69312 (PMC8437439; doi:10.7554/eLife.69312)
Supplement: Figure 1—figure supplement 1—source data 4. [file elife-69312-fig1-figsupp1-data4.xlsx]

## Sheet: Figure 1–figure supplement 1J
	Ct values for different genes
			Avg	SE
		Hprt	21.04	0.04583
		MCU	23.08	0.05364
		MCUb	23.54	0.07265
		EMRE	19.96	0.12741
		Micu1	22.68	0.05457
		Micu2	23.77	0.07638
		Micu3	26.54	0.01856
