# Supplementary material for: The mechanism of MICU-dependent gating of the mitochondrial Ca2+uniporter
Source: eLife. 2021 Aug 31;10:e69312. doi: 10.7554/eLife.69312 (PMC8437439; doi:10.7554/eLife.69312)
Supplement: Figure 1—figure supplement 3—source data 1. [file elife-69312-fig1-figsupp3-data1.xlsx]

## Sheet: Figure 1–figure supplement 3C
	Resting [Ca2+]i in various cell lines
	Control	MCU-KO	EMRE-KO	MICU1-KO	MICU2-KO	MICU3-KO
	66.5893	70.4467	70.0557	59.8872	98.8949	66.6272
	84.1235	66.8293	67.9701	64.0613	80.2903	80.7784
	100.285	51.2214	93.4492	58.8534	76.167	89.0088
	93.8805		29.7863	68.0376	65.4814
	82.7018				66.2218
Mean	85.516	62.8325	65.3153	62.7099	77.4111	78.8048
SE	5.72782	5.89869	13.1762	2.1026	6.07829	6.53591

## Sheet: Figure 1–figure supplement 3D
	Peak [Ca2+]i in various cell lines
	Control	MCU-KO	EMRE-KO	MICU1-KO	MICU2-KO	MICU3-KO
	640.705	570.023	560.316	374.097	654.675	996.414
	633.663	459.268	628.505	268.144	668.851	691.834
	739.765	478.93	461.845	454.315	679.825	681.541
	855.332		386.821	370.116	699.154
	731.941				626.935
Mean	720.281	502.74	509.372	366.668	665.888	789.93
SE	40.3666	34.1166	53.2803	38.1402	12.1505	103.285

## Sheet: Figure 1–figure supplement 3E
	WT	WT		MICU1-KO	MICU1-KO
	[Ca]i	J (nM/mg/sec)		[Ca]i	J (nM/mg/sec)
	0.09114	0.0038		0.16636	0.000166667
	0.07313	0.0028		0.26138	-0.00076
	0.07086	0.0012		0.30618	-0.000633333
	0.20115	0.0084		0.36049	-0.0015
	0.18331	0.0096		0.37192	0.000483333
	0.21026	0.0068		0.45564	0.00348
	0.44554	0.0336		0.46	-0.0011
	0.43112	0.029		0.5664	0.0046
	0.40968	0.0252		0.70436	0.0008
	0.79763	0.0728		0.94537	-0.0044
	0.78163	0.0598		0.94885	-0.0009
	0.87123	0.0756		1.01357	-0.00246
	1.24851	0.0984		1.33916	0.00244
	1.27247	0.0948		1.35711	0.00015
	1.14141	0.0928		1.55562	4e-05
	1.60203	0.1438		1.63393	-0.00453
	1.80228	0.1388		1.75864	0.0063
	1.70405	0.1304		1.95843	0.0111
	0.18352	0.0098		2.04421	0.01492
	0.19289	0.007		2.2245	0.01476
	0.21931	0.009		2.26065	0.03175
	0.34024	0.014		2.36459	0.0191
	0.30805	0.0224		2.37044	0.01428
	0.32089	0.0244		2.38338	0.02825
	0.77036	0.07		2.3846	0.01624
	0.75938	0.0658		2.46799	0.01452
	0.74422	0.054		2.63267	0.01904
	0.09227	0.0014		2.70484	0.04395
	0.08968	0.0016		2.81866	0.04776
	0.21905	0.0182		2.84596	0.01915
	0.2157	0.017		3.15235	0.02428
	0.21328	0.0098		5.9374	0.6246
	0.2329	0.0106		7.25674	0.165
	0.38253	0.0334		5.0766	0.1056
	0.39229	0.0224		5.56235	0.455
	0.38255	0.0316		13.7374	2.8404
	0.70194	0.067		13.9994	3.0366
	0.65556	0.0656		3.24889	0.0376
	0.68868	0.0514		2.82541	0.0402
	1.14121	0.0938		9.41148	1.8012
	1.17373	0.0994		10.7846	1.8406
	1.08756	0.114		11.1319	1.7832
	10.0073	1.1388		8.64362	1.1948
	10.5703	1.16		10.4386	0.7794
	10.0794	0.6732
	4.32612	0.3552
	5.07723	0.3896
	4.47839	0.28
	6.87844	0.622
	6.56356	0.64
	6.84415	0.5756
	16.5252	1.5896
	16.0725	1.5856
	15.8803	1.2888
	18.8299	1.3724
	21.4852	1.6048
	20.681	1.4748
	9.43082	0.7672
	9.03301	0.8636
	8.86198	0.7652
	8.46597	0.66
	31.4833	1.4972
	24.8674	1.2312
	26.3765	1.832
