# Supplementary material for: The mechanism of MICU-dependent gating of the mitochondrial Ca2+uniporter
Source: eLife. 2021 Aug 31;10:e69312. doi: 10.7554/eLife.69312 (PMC8437439; doi:10.7554/eLife.69312)
Supplement: Figure 1—source data 1. [file elife-69312-fig1-data1.xlsx]

## Sheet: Figure 1C
		WT	MCU-KO	MCU-KO + MCU	EMRE-KO	EMRE-KO + EMRE		WT	MCU-KO	MCU-KO + MCU	EMRE-KO	EMRE-KO + EMRE		WT	MCU-KO	MCU-KO + MCU	EMRE-KO	EMRE-KO + EMRE
		30 μM	30 μM	30 μM	30 μM	30 μM		100 μM	100 μM	100 μM	100 μM	100 μM		1 mM	1 mM	1 mM	1 mM	1 mM
		-20.0657	-3.80616	-33.3029	2.1196	-32.8255		-81.0417	-0.89674	-143.393	2.1536	-92.3157		-259.184	-7.10559	-542.491	2.16234	-383.453
		-43.4547	-0.19533	-90.7968	-0.01795	-41.7881		-187.022	-1.5029	-287.928	0.45397	-114.712		-553.191	-1.44085	-1369.5	0.88378	-352.003
		-36.8181	-0.22624	-46.1172	1.02876	-35.5953		-107.509	-0.97804	-177.763	0.19762	-89.7172		-344.441	-2.77053	-965.993	-0.49857	-248.023
		-36.7977	-0.7096	-32.1434	-0.16292	-31.9191		-108.702	-1.04181	-100.049		-80.7911		-443.248	-3.90961	-517.242		-325.486
		-53.0368		-31.9137				-162.266		-143.15						-765.422
	Mean	-38.0346	-1.23433	-46.8548	0.741873	-35.532		-129.308	-1.10487	-170.456	0.935063	-94.3839		-400.016	-3.80665	-832.13	0.849183	-327.242
	SE	5.38672	0.865324	11.3021	0.530441	2.22712		19.5531	0.135956	31.8499	0.613746	7.21134		63.4125	1.20983	157.192	0.768333	28.9417

## Sheet: Figure 1E
		Sodium current (INa) density in various groups (pA/pF)
		WT	MCU-KO	EMRE-KO
		-373.007	-0.8363	-2.26168
		-322.087	-4.44996	-2.46154
		-706.153	-8.60215	-1.65721
		-366.573		-13.2036
		-385.669		-12.15
		-308.711
		-355.825
		-629.107
		-379.86
		-725.166
		-392.11
		-904.248
		-401.045
		-789.688
		-483.746
		-335.527
		-436.497
		-360.933
		-549.06
		-643.977
		-455.971
		-814.114
		-725.441
		-488.807
		-739.043
	Mean	-522.895	-4.62947	-6.3468
	SE	36.481	2.2436	2.59295

## Sheet: Figure 1H
		[Ca2+]i (nM) Threshold for (Ca2+)m uptake
		WT	MICU1-KO	MICU2-KO	MICU3-KO
		418.938	73.6619	252.256	457.228
		404.966	88.1832	310.616	557.841
		447.401	72.608	312.261	498.487
		467.416	92.6239	326.048
		410.184		293.237
	Mean	429.781	81.7693	298.884	504.519
	SE	11.9253	5.07134	12.7681	29.2008

## Sheet: Figure 1I
	WT	WT		MICU1-KO	MICU1-KO
	[Ca]i	G (uS/mg)		[Ca]i	G (uS/mg)
	0.36049	-2.14436		0.09114	5.40754
	1.35711	0.12806		0.07313	3.81342
	2.70484	52.3224		0.07086	1.61674
	2.38338	32.8491		0.20115	10.9683
	2.36459	21.7059		0.18331	12.5405
	0.70436	1.09722		0.21026	8.89779
	0.45564	4.1995		0.44554	42.1512
	0.94885	-1.06631		0.43112	36.4807
	0.16636	0.15275		0.40968	33.0416
	0.37192	0.45912		0.79763	95.3807
	0.30618	-0.59463		0.78163	76.1087
	0.46	-0.98966		0.87123	94.9817
	0.26138	-0.76351		1.24851	135.653
	0.5664	4.5539		1.27247	131.834
	1.01357	-2.38609		1.14141	132.301
	1.75864	6.44661		1.60203	204.169
	1.63393	-4.51653		1.80228	200.773
	2.2245	15.7234		1.70405	193.745
	2.37044	15.4993		0.18352	10.3121
	2.63267	21.3129		0.19289	7.34015
	2.81866	51.6424		0.21931	9.92695
	1.33916	2.93038		0.34024	14.9698
	2.46799	17.3469		0.30805	23.8547
	2.04421	18.5217		0.32089	25.892
	3.15235	31.4883		0.77036	77.0376
	1.95843	15.2966		0.75938	75.9791
	0.94537	-4.78774		0.74422	66.453
	1.55562	-0.02718		0.09227	2.28107
	2.3846	18.8923		0.08968	2.70719
	2.84596	22.8043		0.21905	27.1116
	2.26065	40.1833		0.2157	26.5532
	5.9374	675.924		0.21328	14.6111
	7.25674	192.204		0.2329	16.4256
	5.0766	120.067		0.38253	49.8741
	5.56235	504.545		0.39229	33.365
	13.7374	4296.72		0.38255	48.5395
	13.9994	4584.79		0.70194	104.388
	3.24889	41.9742		0.65556	100.853
	2.82541	45.8317		0.68868	77.3925
	9.41148	2361.15		1.14121	154.764
	10.7846	2485.05		1.17373	163.499
	11.1319	2400.72		1.08756	194.771
	8.64362	1613.53		10.0434	1392.47
	10.4386	1189.62		10.5703	1701.74
				4.32612	524.026
				5.07723	605.569
				4.47839	428.719
				6.87844	924.159
				6.56356	974.601
				6.84415	878.635
				16.5252	2474.38
				16.0725	2475.28
				15.8803	2001.1
				18.8299	2138.55
				21.4852	2530.02
				20.681	2372.83
				9.43082	1240.88
				9.03301	1462.64
				8.86198	1260.64
				8.46597	1121.44
				31.4833	2474.94
				24.8674	2046.21
				26.3765	3098.72
