# Supplementary material for: The mechanism of MICU-dependent gating of the mitochondrial Ca2+uniporter
Source: eLife. 2021 Aug 31;10:e69312. doi: 10.7554/eLife.69312 (PMC8437439; doi:10.7554/eLife.69312)
Supplement: Figure 2—figure supplement 1—source data 5. [file elife-69312-fig2-figsupp1-data5.xlsx]

## Sheet: Figure 2–figure supplement 1A
	ICa (pA/pF) in mitoplasts from WT and various knockout cell lines
	WT	MICU1-KO	MICU2-KO	MICU3-KO
	10 μM	10 μM	10 μM	10 μM
	-14.2455	-3.24379	-23.1111	-16.0803
	-12.582	-6.56152	-40.5248	-12.3349
	-18.2617	-6.47991	-14.3662	-27.3286
	-12.4638	-5.28068	-16.5613	-20.1754
	-45.7949	-6.49226	-22.6155	-12.7877
	-14.0153	-23.5455	-19.4135	-60.1051
	-12.094	-10.162	-21.7265	-14.3238
	-19.8348	-19.6268	-40.0888	-13.2047
	-14.7405	-9.82401		-23.8221
	-62.4856	-16.4172
	-43.977	-4.83159
	-50.7405	-12.1834
	-48.9298	-17.303
Mean	-28.4743	-10.9194	-24.801	-22.2403
SE	5.1687	1.78249	3.54522	5.04992

## Sheet: Figure 2–figure supplement 1C
	Figure 2–figure supplement 1C (upper panel)
	ICa (pA/pF) in mitoplasts from WT and various knockout cell lines at -80 mV
	WT	MICU1-KO	MICU2-KO	MICU3-KO		WT	MICU1-KO	MICU2-KO	MICU3-KO		WT	MICU1-KO	MICU2-KO	MICU3-KO
	10 μM	10 μM	10 μM	10 μM		100 μM	100 μM	100 μM	100 μM		1 mM	1 mM	1 mM	1 mM
	-4.48351	-1.07631	-8.66724	-4.22312		-33.6058	-8.62699	-67.4096	-41.2933		-111.131	-21.8739	-179.363	-83.2574
	-4.91118	-2.4199	-4.37993	-4.31725		-31.4585	-7.00744	-45.0883	-32.2734		-118.281	-22.0427	-148.047	-94.8116
	-6.56959	-0.8166	-5.18384	-10.2166		-33.6239	-6.3492	-28.9845	-33.506		-116.24	-19.6123	-101.367	-95.0572
	-8.08122	-2.31753	-4.74977	-5.87973		-34.548	-15.3069	-26.9479	-33.224		-115.893	-40.8557	-93.4316	-102.332
	-14.6489	-2.47964	-5.56513	-4.07863		-58.9472	-13.6429	-25.8124	-26.3923		-171.528	-38.2675	-83.0923	-96.0636
	-7.06995	-6.5737	-7.0638	-21.8753		-36.2989	-19.8803	-31.8663	-45.1488		-124.602	-55.016	-117.452	-157.985
	-5.51327	-2.02354	-6.58119	-4.23514		-52.7822	-11.2316	-47.4377	-44.9419		-203.879	-51.4045	-159.818	-98.349
	-9.0555	-6.59777	-9.29507	-4.44715		-34.3651	-17.1965	-62.2674	-33.2537		-130.155	-54.2622	-120.817	-144.255
	-4.55399	-4.615		-7.6401		-30.9573	-27.647		-83.6743		-104.094	-78.7958		-159.661
	-15.5743	-6.05135				-36.9869	-35.4026				-90.3293	-90.9175
	-16.5338	-1.49594				-48.3365	-11.0539				-139.844	-30.3301
	-14.6206	-1.66634					-9.39089					-32.316
	-14.45	-3.84497					-17.479					-61.1764
		-4.70006					-17.4265					-58.231
Mean	-9.69737	-3.33419	-6.43575	-7.43478		-39.2646	-15.5458	-41.9768	-41.5231		-129.634	-46.793	-125.423	-114.641
SE	1.30674	0.545763	0.640383	1.93358		2.87062	2.16772	5.75732	5.67358		9.7393	5.74858	12.0142	10.0734
	Figure 2–figure supplement 1C (lower panel)
		ICa (pA/pF) in mitoplasyts from WT and various knockout cell lines at -80 mV
		WT	MICU1-KO	MICU2-KO	MICU3-KO		WT	MICU1-KO	MICU2-KO	MICU3-KO
		5 mM	5 mM	5 mM	5 mM		25 mM	25 mM	25 mM	25 mM
		-189.055	-47.9495	-315.335	-146.224		-278.862	-78.7343	-438.103	-210.051
		-200.337	-39.1297	-275.437	-151.305		-321.009	-58.8079	-402.675	-215.92
		-191.773	-37.762	-173.569	-166.34		-280.171	-60.3784	-248.066	-240.485
		-180.749	-80.0104	-180.098	-205.942		-284.621	-109.204	-264.807	-291.229
		-266.474	-73.5941	-154.427	-175.991		-382.902	-108.725	-225.653	-275.706
		-206.823	-87.7821	-202.379	-235.514		-277.823	-128.814	-295.834	-340.623
		-326.623	-105.099	-244.69	-155.748		-498.255	-157.867	-337.902	-220.259
		-183.03	-101.879	-203.915	-263.058		-239.592	-151.552	-321.395	-377.258
		-178.06	-133.193		-304.815		-253.919	-269.101		-461.162
		-162.273	-167.076				-248.046	-115.743
		-246.884	-61.4501				-369.552	-119.623
			-70.8836					-192.486
			-109.813					-183.873
			-116.915
	Mean	-212.007	-88.0383	-218.731	-200.548		-312.25	-133.455	-316.805	-292.521
	SE	14.7284	9.91106	19.5375	18.7034		23.3249	16.2084	26.2986	28.5816

## Sheet: Figure 2–figure supplement 1G
	Figure 2–figure supplement 1G (lower panel)
	Quantification of EMRE/TOM20 band intensity
	Control	MICU1-KO	MICU1-KO + EMRE
	0.95665	0.50369	0.70607
	0.83116	0.53535	1.09083
	1.28511	0.44525	0.76307
	0.88956	0.42521	1.11489
Mean	0.99062	0.477375	0.918715
SE	0.101456	0.0255062	0.107064

## Sheet: Figure 2–figure supplement 1I
	Figure 2–figure supplement 1I
	ICa (pA/pF) in mitoplasts from WT and various knockout cell lines
	Control	MICU1-KO	MICU1-KO + EMRE			Control	MICU1-KO	MICU1-KO + EMRE
	-120.013	-32.2745	-33.0506			-353.285	-74.2289	-108.431
	-82.6268	-22.3753	-49.5044			-347.99	-72.8967	-127.63
	-125.052	-29.7798	-14.8204			-373.93	-76.2042	-101.729
	-120.099	-51.5168	-34.9067			-367.879	-136.798	-220.264
	-209.247	-43.3848	-11.6418			-498.279	-119.733	-71.6216
	-88.6098	-83.7443	-154.591			-368.78	-182.673	-496.092
	-96.4507	-40.5928	-72.5297			-386.1	-170.007	-308.172
	-101.368	-58.5983				-328.885	-167.276	-222.136
	-158.725	-83.8383				-312.055	-270.641
	-191.695	-116.773				-485.236	-290.245
		-32.0855				-612.233	-102.625
		-66.3123				-600.43	-191.091
		-66.1994				-535.842	-201.242
						-396.337
						-419.672
						-515.953
Mean	-130.43	-57.9333	-56.3323			-436.64	-165.119	-221.092
SE	15.3365	7.88984	21.7127			25.1354	19.9024	55.3203
