# Supplementary material for: The mechanism of MICU-dependent gating of the mitochondrial Ca2+uniporter
Source: eLife. 2021 Aug 31;10:e69312. doi: 10.7554/eLife.69312 (PMC8437439; doi:10.7554/eLife.69312)
Supplement: Figure 2—figure supplement 2—source data 1. [file elife-69312-fig2-figsupp2-data1.xlsx]

## Sheet: Figure 2–figure supplement 2B
	Figure 2–figure supplement 2B
	% inhibition of Sodium current (INa) by 2 nM [Ca2+]
	WT	MICU1-KO
	92.4027	90.4454
	90.7193	92.6762
	91.1506	92.05
	92.4866	97.1148
Mean	91.6898	93.0716
SE	0.444943	1.42724
