# Supplementary material for: The mechanism of MICU-dependent gating of the mitochondrial Ca2+uniporter
Source: eLife. 2021 Aug 31;10:e69312. doi: 10.7554/eLife.69312 (PMC8437439; doi:10.7554/eLife.69312)
Supplement: Figure 2—figure supplement 3—source data 1. [file elife-69312-fig2-figsupp3-data1.xlsx]

## Sheet: Figure 2–figure supplement 3A
	Figure 2–figure supplement 3A (left)							Figure 2–figure supplement 3A (right)
		ICa (pA/pF) at -160 mV							ICa (pA/pF) at -80 mV
		Dnm1l+/+	Dnm1l-/-						Dnm1l+/+	Dnm1l-/-
		-250.241	-612.233						-68.2993	-111.131
		-718.546	-600.43						-216.784	-118.281
		-486.915	-535.842						-121.158	-116.24
		-498.081	-396.337						-120.497	-115.893
		-470.348	-419.672						-128.983	-171.528
		-717.726	-515.953						-217.94	-124.602
		-294.408	-499.745						-83.1262	-203.879
		-408.021	-610.074						-129.728	-130.155
		-415.477	-533.333						-132.28	-104.094
		-381.694	-457.813						-88.2043	-90.3293
		-284.079	-320.142						-84.1915	-139.844
		-236.327	-296.155						-121.363	-187.266
		-385.86	-367.634						-109.11	-184.204
		-320.1	-544.735						-174.831	-141.73
		-499.745	-445.954						-199.507	-122.499
		-610.074	-686.356						-170.334	-131.701
		-533.333	-354.593							-160.972
			-364.878
			-263.755
	Mean	-441.822	-464.507					Mean	-135.396	-138.491
	SE	35.7532	27.5075					SE	11.8677	7.80817

## Sheet: Figure 2–figure supplement 3B
	Figure 2–figure supplement 3B (left)							Figure 2–figure supplement 3B (right)
		INa (pA/pF) at -160 mV							INa (pA/pF) at -80 mV
		Dnm1l+/+	Dnm1l-/-						Dnm1l+/+	Dnm1l-/-
		-1736.16	-770.329						-398.43	-373.007
		-1064.32	-715.748						-254.06	-322.087
		-1023.26	-1360.31						-480.794	-706.153
		-1011.43	-721.519						-531.852	-366.573
		-924.879	-1029.1						-356.351	-385.669
		-681.252	-792.277						-486.694	-308.711
		-952.059	-896.865						-604.01	-355.825
		-1088.46	-591.823							-629.107
			-1393.25							-379.86
			-490.977							-725.166
			-1160.85							-392.11
			-673.814							-904.248
			-1624.79							-401.045
			-606.393							-789.688
			-1382.91							-483.746
			-912.275							-335.527
			-1578.16							-436.497
			-2238.7							-360.933
			-1383.67							-549.06
			-898.219							-643.977
			-1478.79							-455.971
										-814.114
										-725.441
										-488.807
										-739.043
	Mean	-1060.23	-1080.99					Mean	-444.599	-522.895
	SE	106.493	96.6768					SE	44.275	36.481

## Sheet: Figure 2–figure supplement 3D
	Figure 2–figure supplement 3D
	Sodium current (INa) density in various groups (pA/pF)
	WT	MICU1-KO
	-398.43	-183.181
	-254.06	-58.4259
	-480.794	-442.916
	-531.852	-193.473
	-356.351	-318.833
	-486.694	-580.61
	-604.01	-487.984
		-209.342
		-925.875
		-302.549
		-637.11
		-226.501
Mean	-444.599	-380.567
SE	44.275	70.6737

## Sheet: Figure 2–figure supplement 3E
	Figure 2–figure supplement 3E
	Calcium current (ICa) density in various groups (pA/pF)
	WT	MICU1-KO
	-68.2993	-54.7409
	-216.784	-12.5547
	-121.158	-42.3043
	-120.497	-26.0716
	-128.983	-31.5054
	-217.94	-25.575
	-83.1262	-15.1863
	-132.28	-50.0696
	-88.2043	-43.6407
	-84.1915	-37.1514
	-121.363	-69.5237
	-109.11	-84.1883
	-174.831	-55.2323
	-199.507	-123.503
	-170.334	-68.6843
		-109.929
		-47.5737
		-65.6442
Mean	-135.774	-53.5043
SE	12.6807	7.08556

## Sheet: Figure 2–figure supplement 3F
	Figure 2–figure supplement 3F
	ICa/INa in various groups (pA/pF)
	WT	MICU1-KO
	0.332	0.13962
	0.33138	0.25992
	0.25242	0.11305
	0.20515	0.22556
	0.49062	0.11652
	0.40992	0.11974
	0.28201	0.17252
		0.26384
		0.13339
		0.22702
		0.17254
		0.21004
Mean	0.329071	0.17948
SE	0.0365458	0.0162042
