# Supplementary material for: The mechanism of MICU-dependent gating of the mitochondrial Ca2+uniporter
Source: eLife. 2021 Aug 31;10:e69312. doi: 10.7554/eLife.69312 (PMC8437439; doi:10.7554/eLife.69312)
Supplement: Figure 2—source data 1. [file elife-69312-fig2-data1.xlsx]

## Sheet: Figure 2B Upper Panel
	ICa (pA/pF) in mitoplasyts from WT and various knockout cell lines
	WT	MICU1-KO	MICU2-KO	MICU3-KO		WT	MICU1-KO	MICU2-KO	MICU3-KO		WT	MICU1-KO	MICU2-KO	MICU3-KO
	10 μM	10 μM	10 μM	10 μM		100 μM	100 μM	100 μM	100 μM		1 mM	1 mM	1 mM	1 mM
	-14.2455	-3.24379	-23.1111	-16.0803		-120.013	-32.2745	-220.021	-171.246		-353.285	-74.2289	-579.131	-293.418
	-12.582	-6.56152	-40.5248	-12.3349		-82.6268	-22.3753	-175.499	-106.609		-347.99	-72.8967	-518.189	-310.332
	-18.2617	-6.47991	-14.3662	-27.3286		-125.052	-29.7798	-90.063	-108.842		-373.93	-76.2042	-318.826	-285.402
	-12.4638	-5.28068	-16.5613	-20.1754		-120.099	-51.5168	-110.751	-162.954		-367.879	-136.798	-306.167	-421.591
	-45.7949	-6.49226	-22.6155	-12.7877		-209.247	-43.3848	-106.369	-81.0179		-498.279	-119.733	-269.927	-290.934
	-14.0153	-23.5455	-19.4135	-60.1051		-88.6098	-83.7443	-114.083	-139.37		-368.78	-182.673	-383.215	-511.342
	-12.094	-10.162	-21.7265	-14.3238		-156.089	-40.5928	-181.663	-146.364		-386.1	-170.007	-523.052	-290.023
	-19.8348	-19.6268	-40.0888	-13.2047		-96.4507	-58.5983	-251.976	-85.71		-328.885	-167.276	-400.05	-457.718
	-14.7405	-9.82401		-23.8221		-101.368	-83.8383		-233.14		-312.055	-270.641		-455.571
	-62.4856	-16.4172				-158.725	-116.773				-485.236	-290.245
	-43.977	-4.83159				-191.695	-32.0855				-612.233	-102.625
	-50.7405	-12.1834					-66.3123				-600.43	-191.091
	-48.9298	-17.303					-66.1994				-535.842	-201.242
											-396.337
											-419.672
											-515.953
Mean	-28.4743	-10.9194	-24.801	-22.2403		-131.816	-55.9596	-156.303	-137.25		-431.43	-158.128	-412.32	-368.481
SE	5.1687	1.78249	3.54522	5.04992		12.6781	7.5212	21.1135	16.1001		24.0823	19.5971	40.6594	30.4742

## Sheet: Figure 2B Lower Panel
	ICa (pA/pF) in mitoplasyts from WT and various knockout cell lines
	WT	MICU1-KO	MICU2-KO	MICU3-KO		WT	MICU1-KO	MICU2-KO	MICU3-KO
	5 mM	5 mM	5 mM	5 mM		25 mM	25 mM	25 mM	25 mM
	-467.795	-136.337	-806.242	-405.789		-617.723	-188.998	-944.185	-478.058
	-486.827	-101.09	-717.036	-355.613		-760.607	-133.185	-884.266	-430.709
	-494.957	-100.987	-435.304	-383.64		-615.494	-126.348	-521.673	-475.96
	-464.558	-218.101	-448.513	-563.76		-601.819	-261.237	-573.627	-688.997
	-626.826	-190.271	-383.505	-457.931		-728.514	-246.463	-475.636	-568.933
	-484.772	-219.766	-510.015	-601.636		-580.277	-260.631	-619.861	-749.026
	-840.005	-287.642	-619.851	-364.842		-1105.66	-361.035	-739.641	-442.244
	-466.992	-257.22	-527.493	-664.383		-521.742	-321.333	-715.143	-815.445
	-428.9	-368.672		-717.96		-536.023	-592.676		-844.523
	-410.169	-438.893				-504.436	-277.738
	-661.624	-183.155				-820.571	-405.315
		-268.609					-393.126
		-305.122
Mean	-530.311	-236.605	-555.995	-501.728		-672.079	-297.34	-684.254	-610.433
SE	38.6879	27.683	52.0016	45.9765		53.0696	37.5617	59.4514	55.2928

## Sheet: Figure 2D
	Sodium current (INa) density in various groups (pA/pF)
	WT	MICU1-KO
	-373.007	-274.001
	-322.087	-123.317
	-706.153	-642.915
	-366.573	-485.825
	-385.669	-733.517
	-308.711	-597.442
	-355.825	-582.348
	-629.107	-297.42
	-379.86	-183.773
	-725.166	-315.537
	-392.11	-134.723
	-904.248	-352.174
	-401.045	-401.963							Mean
	-789.688	-520.542							SE
	-483.746	-678.392
	-335.527	-489.974
	-436.497	-527.098
	-360.933	-508.344
	-549.06
	-643.977
	-455.971
	-814.114
	-725.441
	-488.807
	-739.043
Mean	-522.895	-436.072
SE	36.481	43.6842

## Sheet: Figure 2E
	Calcium current (ICa) density in various groups (pA/pF)
	WT	MICU1-KO
	-77.4506	-67.9689
	-82.262	-47.5403
	-66.5431	-38.0296
	-107.532	-61.8678
	-92.262	-61.8604
	-127.14	-73.085
	-115.436	-32.103
	-145.035	-23.2538
	-87.9791	-19.7202
	-77.9122	-48.9818
	-86.7028	-73.3251
	-101.845	-74.5671
	-105.512	-95.7955
	-121.063	-68.0233
	-99.8003	-54.901
	-177.437	-63.3673
	-130.633
	-94.8745
	-184.459
	-186.348
	-186.264
	-286.809
	-159.784
	-124.547
	-129.014
	-164.652
Mean	-127.665	-56.5244
SE	9.57054	5.13627

## Sheet: Figure 2F
	ICa/INa ratio from the same mitoplasts in various groups
	WT	MICU1-KO
	0.15222	0.07395
	0.24047	0.07828
	0.11649	0.08434
	0.18153	0.10354
	0.27882	0.1255
	0.29886	0.10794
	0.35731	0.12654
	0.18349	0.0625
	0.38181	0.13908
	0.12132	0.18242
	0.1987	0.14325
	0.09588	0.14121
	0.25395	0.13883
	0.13361	0.10416
	0.25026	0.12465
	0.29744
	0.4065
	0.36193
	0.17279
	0.28644
	0.40868
	0.22879
	0.17168
	0.26394
	0.22279
Mean	0.242628	0.115746
SE	0.0183984	0.00831946

## Sheet: Figure 2G-I
	Mouse	Mouse	Mouse	Mouse	Mouse	Mouse	MEF	MEF	MEF	MEF	MEF	MEF	MEF	MEF	MEF
	WT	WT	WT	MCU-KO	MCU-KO	MCU-KO	WT	WT	WT	MCU-KO	MCU-KO	MCU-KO	MICU1-KO	MICU1-KO	MICU1-KO
	Control	EDTA	EDTA+RuR	Control	EDTA	EDTA+RuR	Control	EDTA	EDTA+RuR	Control	EDTA	EDTA+RuR	Control	EDTA	EDTA+RuR
	-2.98145	15.8089	-3.08238	-2.53036	0.687748	-1.41922	2.65986	31.261	10.3598	-0.884812	3.36885	4.82974	0.987875	24.2723	0.0481627
	-2.51237	19.5019	-0.192511	0.0985109	-5.57797	-2.59852	-1.63356	20.5142	9.5722	-1.1596	2.94759	4.64726	0.168897	24.8258	-0.533299
	0.474876	25.5438	2.4913	1.67061	-2.64122	-1.60854	-3.73304	19.4456	7.28763	0.723569	5.67731	6.69332	-1.44474	20.8522	-1.86288
	0.0723237	13.9271	1.73989	-0.0100576	0.414761	-0.453811	-1.0055	25.4756	10.0062	1.32085	6.49409	4.65356	1.56867	22.8845	1.12432
	0.536112	15.2706	0.933868	0.202257	-0.189113	-1.6591	3.71225	27.7004			4.84948		-1.2807	19.4481
	1.48077	15.8846	2.30647	0.460976	1.06533	1.87504		30.1116
	1.16146	11.9245	0.822674	0.698423	-0.508501	-0.965821
	1.65117	14.8454	-0.367585	-0.636706	1.0402	1.03551
	0.117103	18.0382	2.2525	0.0463515	2.52198	1.79464
Mean	-9.2056e-16	16.7494	0.767135	8.06839e-15	-0.354088	-0.444425	6.57252e-15	25.7514	9.30646	6.21725e-15	4.66746	5.20597	-3.89466e-14	22.4566	-0.305923
SE	0.552783	1.31903	0.595737	0.379185	0.803448	0.543605	1.38692	2.0036	0.691948	0.605239	0.67208	0.497584	0.599691	1.01779	0.62228
