# Supplementary material for: The mechanism of MICU-dependent gating of the mitochondrial Ca2+uniporter
Source: eLife. 2021 Aug 31;10:e69312. doi: 10.7554/eLife.69312 (PMC8437439; doi:10.7554/eLife.69312)
Supplement: Figure 3—figure supplement 1—source data 3. [file elife-69312-fig3-figsupp1-data3.xlsx]

## Sheet: Figure 3–figure supplement 1B
		Figure 3–figure supplement 1B
		Effect of matrix [Ca2+] on ICa
	Pipette [Ca2+]	0 Ca	400 nM Ca	400 uM Ca		0 Ca	400 nM Ca	400 uM Ca		0 Ca	400 nM Ca	400 uM Ca
	Bath [Ca2+]	100 μM	1 mM	5 mM		100 μM	1 mM	5 mM		100 μM	1 mM	5 mM
		-81.0417	-105.656	-106.391		-259.184	-356.132	-436.766		-430.547	-478.088	-571.573
		-187.022	-97.9437	-169.259		-553.191	-298.019	-542.546		-659.147	-409.843	-722.485
		-107.509	-116.596	-126.107		-344.441	-379.792	-354.415		-446.146	-541.929	-463.92
		-108.702	-186.786			-443.248	-535.756				-747.842
		-162.266
	Mean	-129.308	-126.745	-133.919		-400.016	-392.424	-444.575		-511.947	-544.426	-585.993
	SE	19.5531	20.3761	18.5638		63.4125	50.7716	54.4489		73.7378	72.9713	74.9889
