# Supplementary material for: The mechanism of MICU-dependent gating of the mitochondrial Ca2+uniporter
Source: eLife. 2021 Aug 31;10:e69312. doi: 10.7554/eLife.69312 (PMC8437439; doi:10.7554/eLife.69312)
Supplement: Figure 3—source data 2. [file elife-69312-fig3-data2.xlsx]

## Sheet: Figure 3B Lower Panel
	Effect of WT and mut-EF-MICU proteins in respective knockout background
	WT	MICU1-KO	MICU1-KO + MICU1	MICU1-KO + mut-EF-MICU1
	-353.285	-74.2289	-340.358	-151.855
	-347.99	-72.8967	-242.922	-177.282
	-373.93	-76.2042	-296.412	-211.918
	-367.879	-136.798	-239.591	-169.92
	-498.279	-119.733	-358.742	-61.0654
	-368.78	-182.673	-308.398	-104.559
	-386.1	-170.007	-489.69	-139.365
	-328.885	-167.276	-357.889
	-312.055	-270.641
	-485.236	-290.245
	-612.233	-102.625
	-600.43	-191.091
	-535.842	-201.242
	-396.337
	-419.672
	-515.953
	-457.813
	-320.142
	-296.155
	-367.634
	-544.735
	-445.954
	-686.356
	-354.593
	-364.878
	-263.755
Mean	-423.265	-158.128	-329.25	-145.138
SE	21.1002	19.5971	28.208	18.8352

## Sheet: Figure 3C Lower Panel
	Effect of WT and mut-EF-MICU proteins in respective knockout background
	WT	MICU2-KO	MICU2-KO + MICU2	MICU2-KO + mut-EF-MICU2
	-353.285	-579.131	-721.667	-346.484
	-347.99	-518.189	-315.611	-333.168
	-373.93	-318.826	-346.426	-266.453
	-367.879	-306.167	-342.115	-212.778
	-498.279	-269.927	-480.888	-445.12
	-368.78	-383.215	-479.818	-208.912
	-386.1	-523.052	-356.313	-288.088
	-328.885	-400.05		-352.251
	-312.055			-247.1
	-485.236			-174.385
	-612.233			-280.479
	-600.43			-220.206
	-535.842			-365.209
	-396.337			-409.09
	-419.672			-216.837
	-515.953
	-457.813
	-320.142
	-296.155
	-367.634
	-544.735
	-445.954
	-686.356
	-354.593
	-364.878
	-263.755
Mean	-423.265	-412.32	-434.691	-291.104
SE	21.1002	40.6594	54.1624	20.8658

## Sheet: Figure 3D Lower Panel
	Effect of WT and mut-EF-MICU proteins in respective knockout background
	WT	MICU3-KO	MICU3-KO + MICU3	MICU3-KO + mut-EF-MICU3
	-353.285	-293.418	-346.57	-550.372
	-347.99	-310.332	-342.77	-598.361
	-373.93	-285.402	-509.309	-504.809
	-367.879	-421.591	-517.214	-426.568
	-498.279	-290.934	-419.276	-331.026
	-368.78	-511.342	-478.815	-461.614
	-386.1	-290.023	-426.334	-336.594
	-328.885	-457.718	-429	-689.828
	-312.055	-455.571	-644.824	-315.166
	-485.236		-237.559	-474.596
	-612.233			-685.755
	-600.43
	-535.842
	-396.337
	-419.672
	-515.953
	-457.813
	-320.142
	-296.155
	-367.634
	-544.735
	-445.954
	-686.356
	-354.593
	-364.878
	-263.755
Mean	-423.265	-368.481	-435.167	-488.608
SE	21.1002	30.4742	35.5737	40.2578

## Sheet: Figure 3F
	Kinetics of MCU activation and deactivation
	Tau activation				Tau deactivation
	WT	MICU1-KO			WT	MICU1-KO
	0.63998	1.18826			0.80439	0.64905
	0.87869	0.44841			0.65057	0.38969
	0.55616	0.51482			0.83954	0.68139
Mean	0.69161	0.717163		Mean	0.764833	0.573377
SE	0.0966189	0.236327		SE	0.0580257	0.0923166

## Sheet: Figure 3G_Rightmost Panel
	Amplitude of outward Calcium current (ICa) at +80 mV (pA/pF)
	WT	MICU1-KO		WT	MICU1-KO		WT	MICU1-KO		WT	MICU1-KO
[Ca2+]	0	0		100 nM	100 nM		500 nM	500 nM		1 mM	1 mM
	1.64631	1.1103		1.47302	1.25259		1.55518	1.2601		1.47275	0.98419
	0.70018	2.28146		0.67684	2.17477		0.7034	2.36139		0.58923	1.86484
	1.83287	1.40853		2.00348	1.41846		2.20881	2.09427		1.59931	1.13773
Mean	1.39312	1.6001		1.38445	1.61527		1.48913	1.90525		1.22043	1.32892
SE	0.350631	0.351391		0.38552	0.283817		0.435827	0.331665		0.317708	0.271601
