# Supplementary material for: The mechanism of MICU-dependent gating of the mitochondrial Ca2+uniporter
Source: eLife. 2021 Aug 31;10:e69312. doi: 10.7554/eLife.69312 (PMC8437439; doi:10.7554/eLife.69312)
Supplement: Figure 4—source data 1. [file elife-69312-fig4-data1.xlsx]

## Sheet: Figure 4C
	ICa: Single Channel current amplitude (pA)
		-40 mV	WT	MICU1-KO
			-0.05147	-0.1057
			-0.08857	-0.1012
			-0.09228	-0.08017
			-0.07543	-0.06869
			-0.0827	-0.0673
			-0.06078
		Mean	-0.075205	-0.084612
		SE	0.00657732	0.00803994
		-80 mV	WT	MICU1-KO		WT	MICU1-KO
			O1	O1		O2	O2
			-0.14778	-0.17		-0.21414	-0.24
			-0.20955	-0.21177		-0.29129	-0.30224
			-0.18955	-0.18		-0.26814	-0.28
			-0.15461	-0.17459		-0.24658	-0.245
			-0.13472	-0.18		-0.21331	-0.26
			-0.13039	-0.153		-0.1879	-0.249
			-0.19114			-0.26258
		Mean	-0.165391	-0.178227		-0.240563	-0.262707
		SE	0.0117401	0.00785012		0.0138607	0.0098086
		-120 mV	WT	MICU1-KO		WT	MICU1-KO		WT	MICU1-KO
			O1	O1		O2	O2		O3	O3
			-0.265	-0.34916		-0.3711	-0.46181		-0.4996	-0.52018
			-0.27776	-0.31284		-0.4587	-0.41091		-0.57267	-0.49498
			-0.33011	-0.3		-0.43019	-0.4		-0.51636	-0.48
			-0.3259	-0.31754		-0.42494	-0.41458		-0.58596	-0.49741
			-0.32845	-0.3081		-0.44303	-0.41367		-0.52	-0.49365
		Mean	-0.305444	-0.317528		-0.425592	-0.420194		-0.538918	-0.497244
		SE	0.0140681	0.00842223		0.0148175	0.0107237		0.0169776	0.00648647

## Sheet: Figure 4D
	ICa: Single Channel current open probability
		-40 mV	WT	MICU1-KO
			0.3704	0.15831
			0.17351	0.05752
			0.16364	0.03686
			0.30927	0.04165
			0.29227	0.15137
		Mean	0.261818	0.089142
		SE	0.0402531	0.0270605
		-80 mV	WT	MICU1-KO		WT	MICU1-KO
			O1	O1		O2	O2
			0.41238	0.00159		0.17084	0.04336
			0.26009	0.07981		0.12733	0.06801
			0.07449	0.05799		0.13013	0.09054
			0.48663	0.03336		0.15597	0.0525
			0.11932	0.04788		0.30193	0.08016
			0.02899	0.00525		0.12101	0.02757
			0.16577	0.15543		0.15543
		Mean	0.221096	0.0544729		0.166091	0.0603567
		SE	0.0655446	0.0198539		0.0236637	0.00963908
		-120 mV	WT	MICU1-KO		WT	MICU1-KO		WT	MICU1-KO
			O1	O1		O2	O2		O3	O3
			0.754	0.22392		0.13646	0.0314		0.03004	0.02393
			0.09359	0.24932		0.45689	0.19412		0.25384	0.09423
			0.22734	0.20994		0.22374	0.13591		0.1628	0.09638
			0.4739	0.26956		0.32656	0.20689		0.11705	0.10111
			0.29413	0.12991		0.24801	0.07248		0.10152	0.01469
		Mean	0.368592	0.21653		0.278332	0.12816		0.13305	0.066068
		SE	0.114182	0.0239671		0.0539612	0.0339647		0.0369706	0.019177

## Sheet: Figure 4E
	ICa: Total Current (pA)
		-40 mV	WT	MICU1-KO
			-0.0190449	-0.0163516
			-0.0155908	-0.00582075
			-0.0151	-0.00303382
			-0.0257521	-0.00286081
			-0.0177646	-0.0101771
		Mean	-0.0186505	-0.00764882
		SE	0.00191495	0.00254653
		-80 mV	WT	MICU1-KO
			-0.0974528	-0.00775242
			-0.0916536	-0.0384735
			-0.0490142	-0.0325359
			-0.080478	-0.0173387
			-0.0265171	-0.0268766
			-0.0724964	-0.00552604
		Mean	-0.069602	-0.0214172
		SE	0.0110586	0.00547794
		-120 mV	WT	MICU1-KO
			-0.265458	-0.105129
			-0.381261	-0.204481
			-0.255381	-0.163609
			-0.259276	-0.221794
			-0.17916	-0.0771943
		Mean	-0.268107	-0.154441
		SE	0.0323747	0.0278597
