# Supplementary material for: The mechanism of MICU-dependent gating of the mitochondrial Ca2+uniporter
Source: eLife. 2021 Aug 31;10:e69312. doi: 10.7554/eLife.69312 (PMC8437439; doi:10.7554/eLife.69312)
Supplement: Figure 5—source data 1. [file elife-69312-fig5-data1.xlsx]

## Sheet: Figure 5C
	INa: Single Channel current amplitude (pA)
		-40 mV	WT			MICU1-KO
			Avg	SE		Avg	SE
		O1	-0.32952	0.00713		-0.33929	0.01844
		O2	-0.49151	0.01492		-0.45764	0.0138
		O3	-0.65418	0.0223		-0.58635	0.01992
		O4	-0.89333	0.03455		-0.87155	0.03448
		-80 mV	WT			MICU1-KO
			Avg	SE		Avg	SE
		O1	-0.60881	0.02899		-0.67139	0.02401
		O2	-0.83153	0.01749		-0.79701	0.03948
		O3	-1.0748	0.04067		-1.03625	0.0367
		O4	-1.34676	0.03141		-1.37832	0.05335
		O5	-1.78773	0.02341		-1.84199	0.05417
			WT			MICU1-KO
		-120 mV	Avg	SE		Avg	SE
		O1	-1.20373	0.06996		-1.31923	0.05475
		O2	-1.61086	0.0805		-1.68808	0.0544
		O3	-1.9672	0.03569		-1.9281	0.01728
		O4	-2.26357	0.10123		-2.47862	0.09688
		O5	-3.21272	0.15487		-3.26952	0.18643
			WT			MICU1-KO
		-160 mV	Avg	SE		Avg	SE
		O1	-2.05545	0.05884		-2.1052	0.06698
		O2	-2.37136	0.03548		-2.4346	0.05345
		O3	-2.77085	0.08245		-2.88599	0.06404
		O4	-3.31838	0.04251		-3.43408	0.01472
		O5	-3.86694	0.04532		-3.78586	0.09449
		O6	-4.53287	0.19641		-4.61743	0.08632
		O7	-5.49143	0.19118		-5.65652	0.17634

## Sheet: Figure 5D
	INa: Single Channel current open probability
		WT	WT	MICU1-KO	MICU1-KO
		Avg	SE	Avg	SE
	-40	0.2119	0.0756	0.23613	0.0252
	-80	0.08962	0.0756	0.11801	0.0252
	-120	0.15365	0.08082	0.25867	0.0959
	-160	0.51664	0.10691	0.59066	0.10824

## Sheet: Figure 5E
	INa: Total Current (pA)
		WT	WT	MICU1-KO	MICU1-KO
		Avg	SE	Avg	SE
	-40	-0.10664	0.02151	-0.11682	0.02196
	-80	-0.0854	0.0228	-0.12795	0.03252
	-120	-0.29296	0.06814	-0.53728	0.17797
	-160	-1.47544	0.42772	-1.6246	0.37286
