# Supplementary material for: The mechanism of MICU-dependent gating of the mitochondrial Ca2+uniporter
Source: eLife. 2021 Aug 31;10:e69312. doi: 10.7554/eLife.69312 (PMC8437439; doi:10.7554/eLife.69312)
Supplement: Figure 6—source data 1. [file elife-69312-fig6-data1.xlsx]

## Sheet: Figure 6C
	Manganese current (IMn) density in various groups (pA/pF)
		WT	MCU-KO	EMRE-KO
		-91.0119	0	0
		-75.5582	0	0
		-56.6454	0	0
		-99.244	-1.87
		-73.078	0
		-94.2064
	Mean	-81.624	-0.374	0
	SE	6.55914	0.374	0

## Sheet: Figure 6D
	INa and IMn density at equivalent concentration in WT (pA/pF)
		ICa	IMn
		-467.795	-91.0119
		-486.827	-75.5582
		-494.957	-56.6454
		-464.558	-99.244
		-626.826	-73.078
		-484.772	-94.2064
		-840.005
		-466.992
		-428.9
		-410.169
		-661.624
		-571.573
		-722.485
		-463.92
	Mean	-542.243	-81.624
	SE	33.618	6.55914

## Sheet: Figure 6G
	IMn density in various groups (pA/pF)
		WT	MICU1-KO
		-91.0119	-10.6049
		-75.5582	-55.4078
		-56.6454	-60.0179
		-99.244	-64.0869
		-73.078	-61.6069
		-94.2064	-21.7841
			-38.1427
			-59.32
	Mean	-81.624	-46.3714
	SE	6.55914	7.23706

## Sheet: Figure 6H
	ICa density in various groups (pA/pF)
		WT	MICU1-KO
		-457.813	-43.2205
		-320.142	-318.487
		-296.155	-232.273
		-367.634	-199.444
		-544.735	-40.6901
		-445.954	-227.478
			-108.652
			-135.963
			-206.641
			-212.001
			-142.41
	Mean	-405.406	-169.751
	SE	38.4861	25.5272

## Sheet: Figure 6I
	IMn/ICa ratio in various groups
		WT	MICU1-KO
		0.1988	0.24537
		0.23601	0.17397
		0.19127	0.25839
		0.26995	0.32133
		0.13415	0.27083
		0.21125	0.20049
			0.18458
			0.27981
			0.2845
	Mean	0.206905	0.246586
	SE	0.0186584	0.016708

## Sheet: Figure 6J
	% Inhibition of ICa by IMn
		WT	MICU1-KO
		59.8786	75.1784
		77.7494	57.0521
		62.1897	63.1412
			70.5836
			57.2741
	Mean	66.6059	64.6459
	SE	5.61155	3.60875
