# Supplementary material for: The mechanism of MICU-dependent gating of the mitochondrial Ca2+uniporter
Source: eLife. 2021 Aug 31;10:e69312. doi: 10.7554/eLife.69312 (PMC8437439; doi:10.7554/eLife.69312)
Supplement: Figure 7—source data 1. [file elife-69312-fig7-data1.xlsx]

## Sheet: Figure 7B
		Calcium current (ICa) at -160 mV (pA/pF) in WT, in the absence and presence of 1 mM [Mg2+]
	[Mg2+]	0	1000 μM		0	1000 μM		0	1000 μM		0	1000 μM
	[Ca2+]	10 μM	10 μM		100 μM	100 μM		1 mM	1 mM		5 mM	5 mM
		0.93947	0.03084		0.99583	0.3012		0.92425	0.72282		0.93682	1.12096
		0.82976	0.13914		0.68561	0.19581		0.91039	0.53964		0.97494	0.88943
		1.20433	0.34366		1.03764	0.25429		0.97825	0.55817		0.99122	0.86282
		0.82197			0.99654			0.96242			0.93034
		0.92429			0.73526			1.30357			1.2553
		1.30807			0.80032			0.96478			0.97082
		0.97211			0.84112			1.01009			0.93521
					1.31705			0.86041			0.85893
					1.59063			0.81638			0.82142
								1.26945			1.32499
	Mean	1	0.171213		1	0.250433		0.999999	0.606877		0.999999	0.957737
	SE	0.0702899	0.0917163		0.0975288	0.0304845		0.0510942	0.0582179		0.0513362	0.0819724

## Sheet: Figure 7C
		Inhibition of ICa by 200 μM Mg2+
		0 μM [Mg2+]	0 μM [Mg2+]			200 μM [Mg2+]	200 μM [Mg2+]
		WT	MICU1-KO			WT	MICU1-KO
		-28.9535	-13.5201			-14.9204	-4.5899
		-37.7184	-7.33957			-17.4271	-4.17425
		-27.9392	-11.2931			-11.3458	-4.82035
		-18.0423	-8.44436			-8.16607	-9.41533
		-36.2599	-23.4551			-15.2981	-14.2335
			-35.3266
	Mean	-29.7826	-16.5631			-13.4315	-7.44666
	SE	3.5132	4.42564			1.63922	1.94556

## Sheet: Figure 7D
		Inhibition curve for Mg2+ inhibition of ICa
			WT	WT	MICU1-KO	MICU1-KO
		[Mg2+] (μM)	Avg	SE	Avg	SE
		30	0.76993	0.02541	0.744726	0.0466378
		200	0.45159	0.01887	0.449976	0.0400114
		1000	0.16524	0.01161	0.24213	0.0232741
		3000	0.03934	0.01348	0.0834496	0.0456005
