# Supplementary material for: The mechanism of MICU-dependent gating of the mitochondrial Ca2+uniporter
Source: eLife journal article supplement (doi:10.7554/elife.69312), 2021-08-31
Supplement: supp [file elife_poa_e69312_Figure_3_figure_supplement_1_source_data_2.pdf › elife_poa_e69312_Figure_3_figure_supplement_1_source_data_2.pdf]

MCU

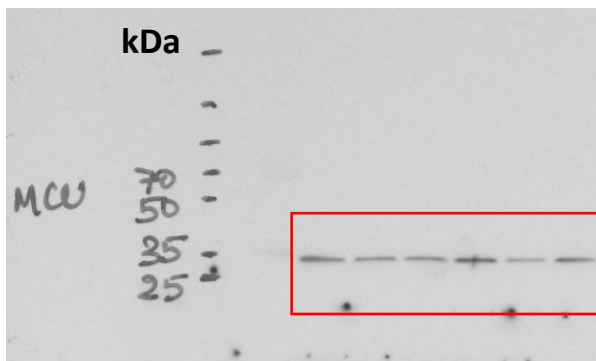

MICU3

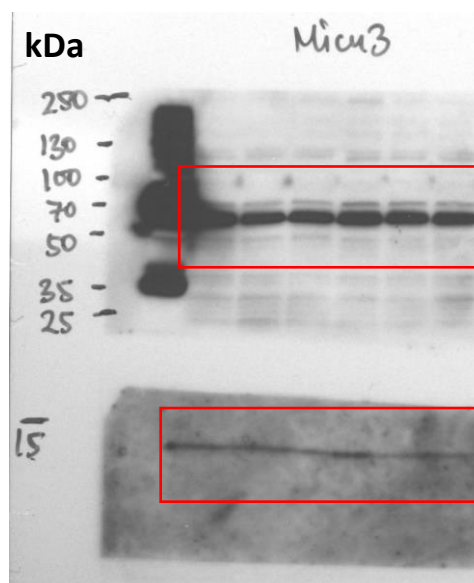

EMRE

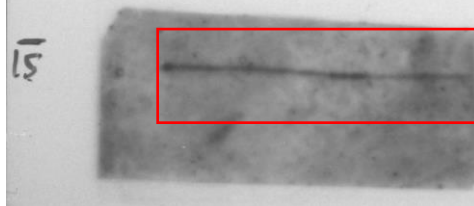

HSP60

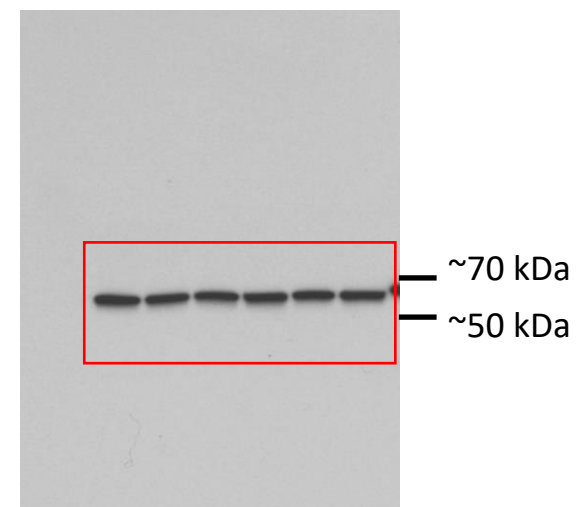

TOM20

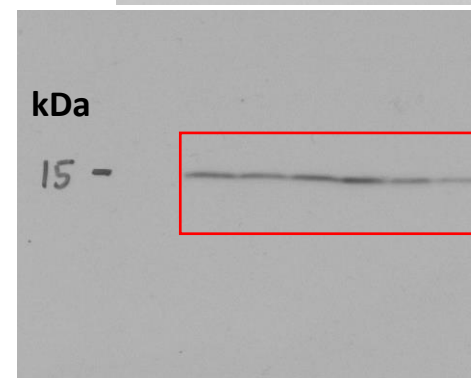

Figure 3—figure supplement 1—source data 2. Raw Western blot image for panel A (*Lower*).
