# Supplementary material for: The mechanism of MICU-dependent gating of the mitochondrial Ca2+uniporter
Source: eLife journal article supplement (doi:10.7554/elife.69312), 2021-08-31
Supplement: supp [file elife_poa_e69312_Figure_3_source_data_1.pdf › elife_poa_e69312_Figure_3_source_data_1.pdf]

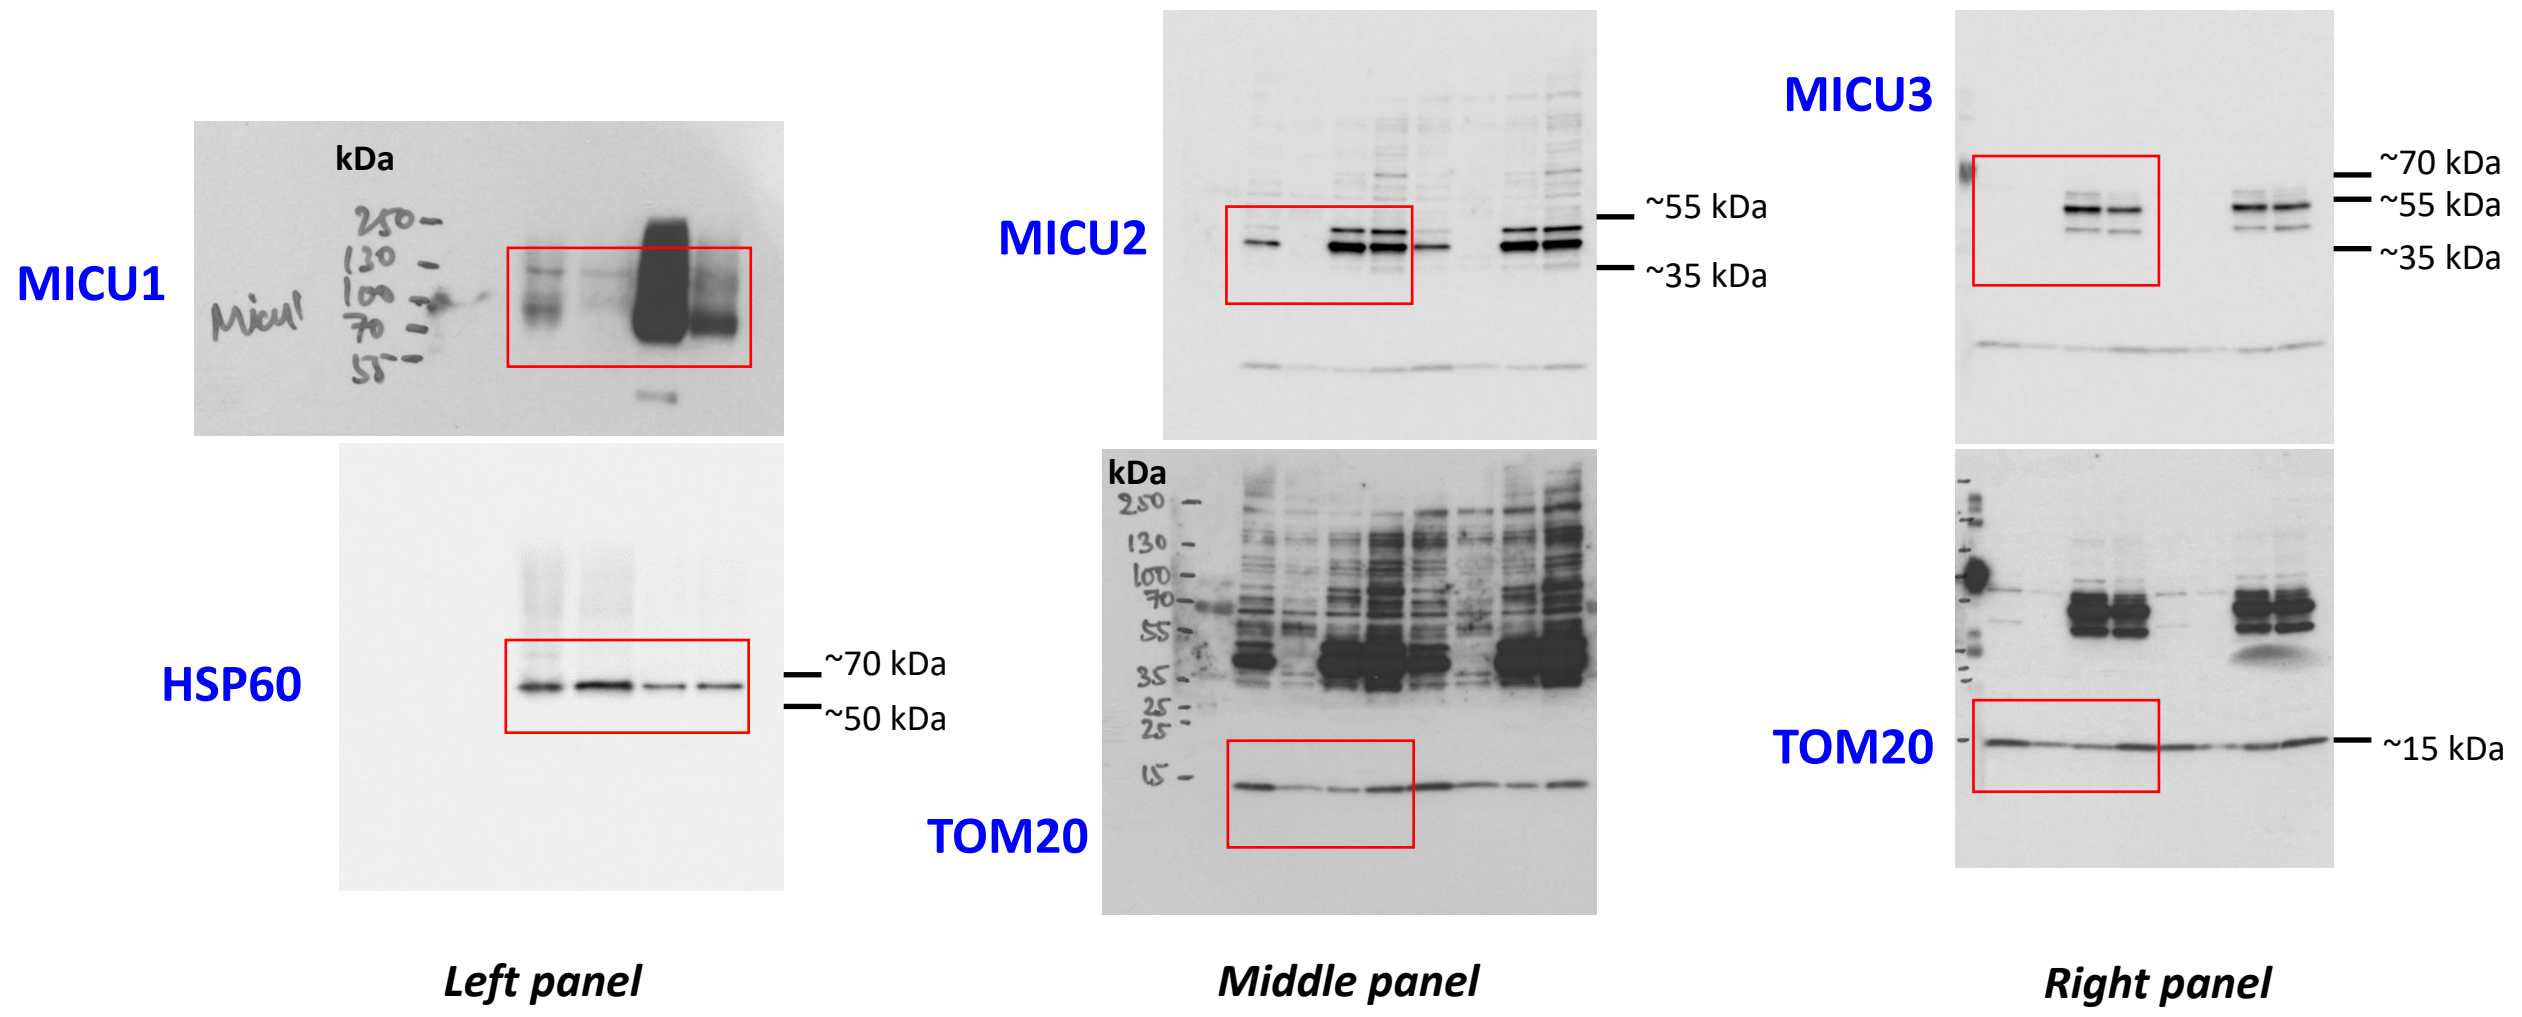

Figure 3—source data 1. Raw Western blot image for panel A.
